# Supplementary material for: Few layer graphene does not affect the function and the autophagic activity of primary lymphocytes
Source: Royal Society of Chemistry journal article supplement (doi:10.1039/c9nr00846b), 2019-01-01
Supplement: c9nr00846b1.pdf [file c9nr00846b1.pdf]

## **Few layer graphene does not affect the function and the autophagic activity of primary lymphocytes**

*Diane Murera,<sup>1</sup> Sowmya Malaganahalli,<sup>1</sup> Cristina Martín,<sup>1</sup> Giacomo Reina,<sup>1</sup> Jean-Daniel Fauny,<sup>1</sup> H el ene Dumortier,<sup>1</sup> Ester V azquez,<sup>2,3</sup> Alberto Bianco<sup>1,\*</sup>*

<sup>1</sup>University of Strasbourg, CNRS, Immunology, Immunopathology and Therapeutic Chemistry, UPR 3572, 67000 Strasbourg, France. E-mail: [a.bianco@ibmc-cnrs.unistra.fr](mailto:a.bianco@ibmc-cnrs.unistra.fr)

<sup>2</sup>Instituto Regional de Investigaci n Cient fica Aplicada (IRICA), Universidad de Castilla-La Mancha, Avda Camilo Jose Cela, 13071 Ciudad Real, Spain.

<sup>3</sup>Departamento de Qu mica Org nica, Facultad de Ciencias y Tecnolog as Qu micas, Universidad de Castilla-La Mancha, 13071 Ciudad Real, Spain.

Electronic Supplementary Information

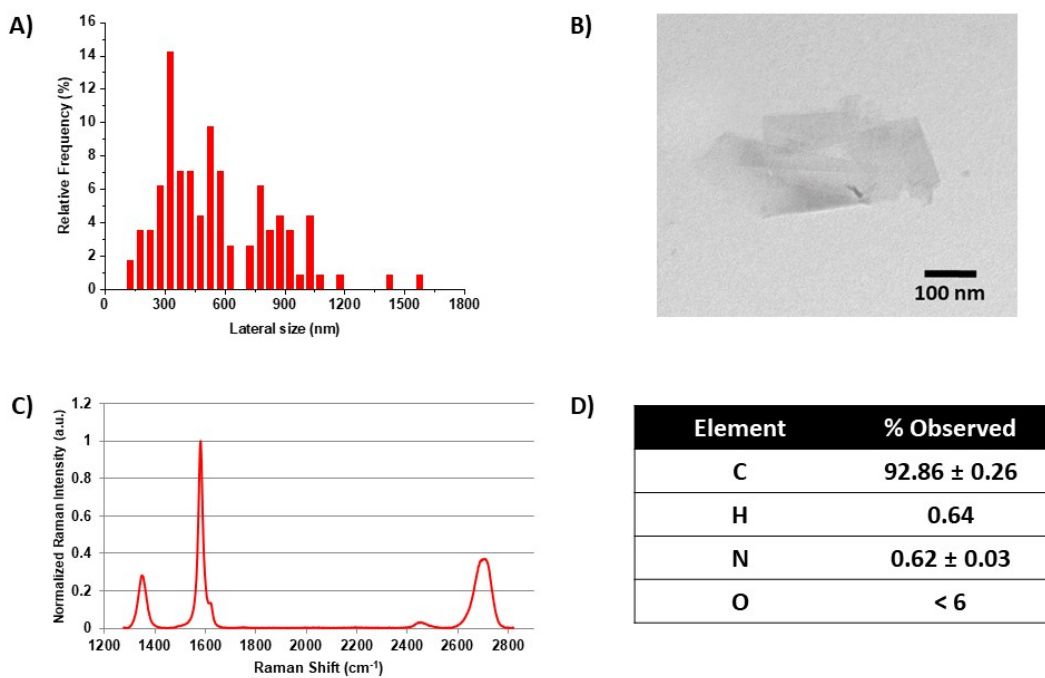

**Figure S1.** Characterization of FLG sheets. A) Lateral size distribution (n=112) of the FLG flakes employed throughout the study by transmission electron microscopy. A representative TEM image of FLG is shown in (B). (C) Average Raman spectrum (n≥20) of FLG (FWHM (2D)=65.54, I<sub>D</sub>/I<sub>G</sub>=0.28, I<sub>2D</sub>/I<sub>G</sub>=0.37). (D) Elemental analysis of FLG (the melamine traces resulted in 0.93 ppm).

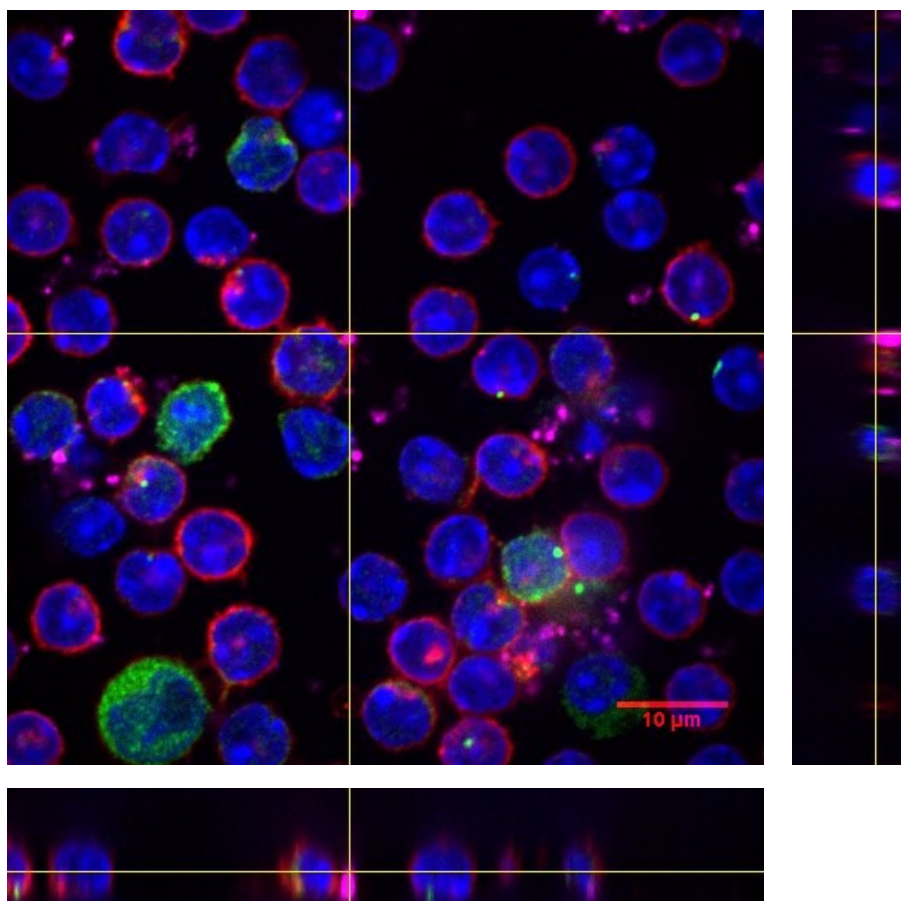

**Figure S2.** Confocal microscopy study of FLG-QD (pink) interaction with cell membrane and autophagosomes of B lymphocytes. Zeta-stacking and orthogonal view respectively, of confocal images of B cells incubated with  $10 \mu\text{g mL}^{-1}$  FLG for 24 h. The nucleus is stained with DAPI (blue), the autophagosomes with an anti-LC3 antibody (green) and the membranes with an anti-MHC-II antibody (red). The images were taken on a spinning-disk confocal microscope with a  $100\times$  objective and the indicated scale is  $10 \mu\text{m}$ .

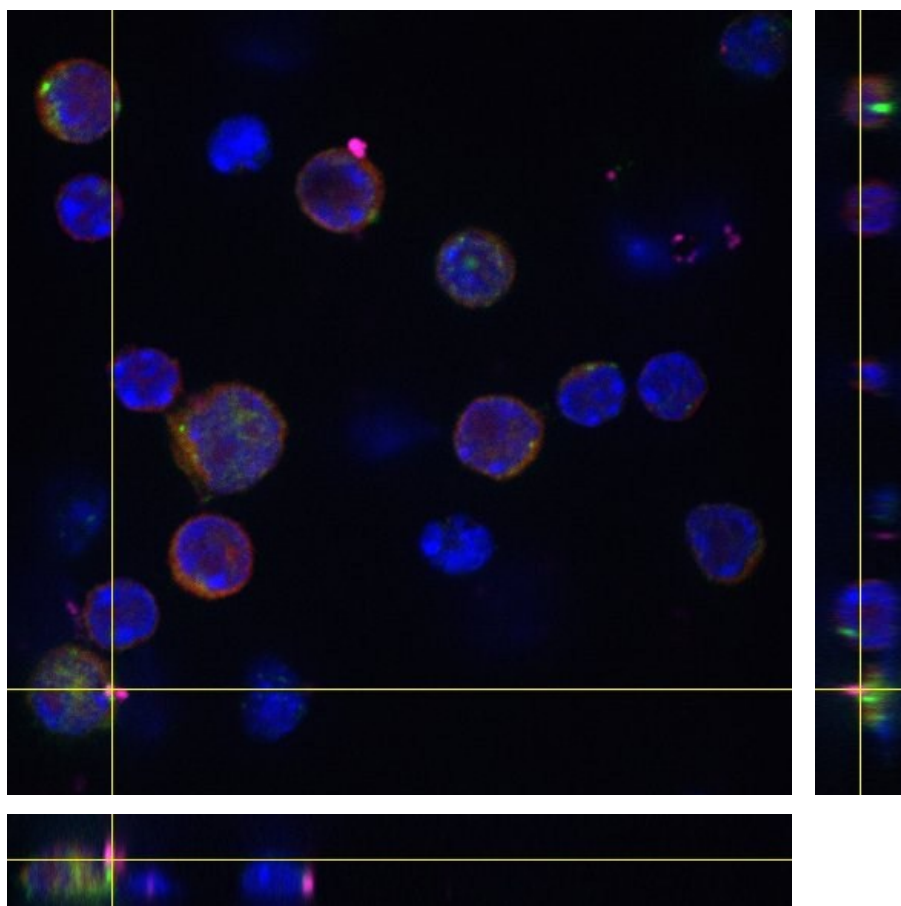

**Figure S3.** Confocal microscopy study of FLG-QD (pink) interaction with cell membrane and autophagosomes of T lymphocytes. Zeta-stacking and orthogonal view respectively, of confocal images of T cells incubated with  $10 \mu\text{g mL}^{-1}$  FLG for 24 h. The nucleus is stained with DAPI (blue), the autophagosomes with an anti-LC3 antibody (green) and the membranes with an anti-TCRb antibody (red). The images were taken on a spinning-disk confocal microscope with a  $100\times$  objective and the indicated scale is  $10 \mu\text{m}$ .

**Video S1.** Overlay of the z stacking of FLG (black) after 24 h in the presence of fluorescein (green).

**Video S2.** Overlay of the z stacking of B lymphocytes after 24 h incubation with  $10 \mu\text{g mL}^{-1}$  of FLG. In blue, DAPI; in green, LC3; in red, MHC-II; in magenta: FLG-QDs.

**Video S3.** Overlay of the z stacking of T lymphocytes after 24 h incubation with  $10 \mu\text{g mL}^{-1}$  of FLG. In blue, DAPI; in green, LC3; in red, TCRb; in magenta: FLG-QDs.
